# Supplementary material for: Tailoring doxorubicin sustainable release from biopolymeric smart matrix using congo red as molecular helper
Source: Royal Society of Chemistry journal article supplement (doi:10.1039/c3tb20531b), 2014-06-13

## Supplementary material

**Fig. 8 a.** FTIR spectra of Doxorubicin like free molecule (pink line) and FTIR spectra of Doxorubicin with Congo Red (red line). **b.** FTIR spectra of Congo Red like free molecule (violet line) and FTIR spectra of Doxorubicin with Congo Red (red line).

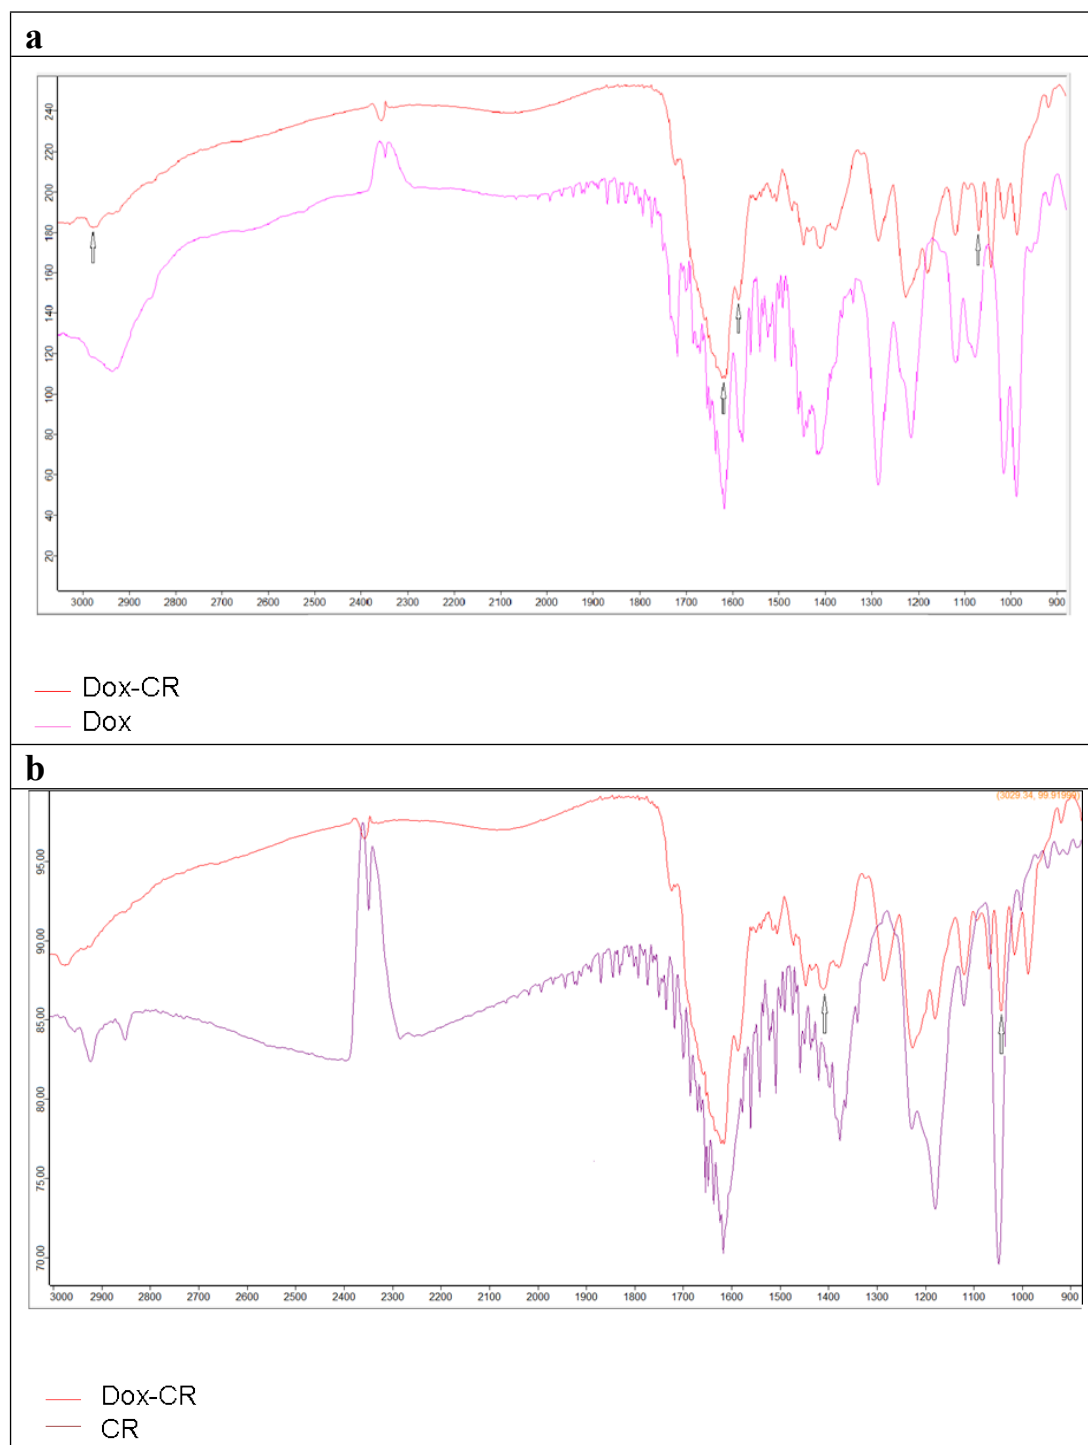

Supplement: c3tb20531b1.pdf [file c3tb20531b1.pdf]
